# Supplementary material
Source: publisher site journal article supplement (https://www.dovepress.com/article/263805)
Supplement: Supplementary file 1 [file get_supplementary_file.php]

**Appendix:**

Table S1: Number of patients per facility

(The name of facilities has been blinded for confidentiality purpose)

| **Facility** | No of Patients | % of total patients |
| --- | --- | --- |
| 1 | 2587 | 0.4 |
| 2 | 15979 | 2.8 |
| 3 | 18927 | 3.3 |
| 4 | 20833 | 3.6 |
| 5 | 24243 | 4.2 |
| 6 | 26980 | 4.7 |
| 7 | 29415 | 5.1 |
| 8 | 31424 | 5.5 |
| 9 | 33594 | 5.8 |
| 10 | 50169 | 8.7 |
| 11 | 51846 | 9.0 |
| 12 | 53978 | 9.4 |
| 13 | 54321 | 9.4 |
| 14 | 72545 | 12.6 |
| 15 | 89313 | 15.5 |
| Total | 576154 | 100.0 |

Table S2: Distribution of Patient by month

| **Month** | No of Patients | % of total patients |
| --- | --- | --- |
| Jul | 42891 | 7.4 |
| Jan | 43900 | 7.6 |
| Feb | 44281 | 7.7 |
| Aug | 44746 | 7.8 |
| Jun | 45763 | 7.9 |
| Apr | 45933 | 8.0 |
| Mar | 48745 | 8.5 |
| Sep | 49306 | 8.6 |
| Dec | 50181 | 8.7 |
| May | 51333 | 8.9 |
| Nov | 54148 | 9.4 |
| Oct | 54927 | 9.5 |
| Total | 576154 | 100.0 |
|  |  |  |


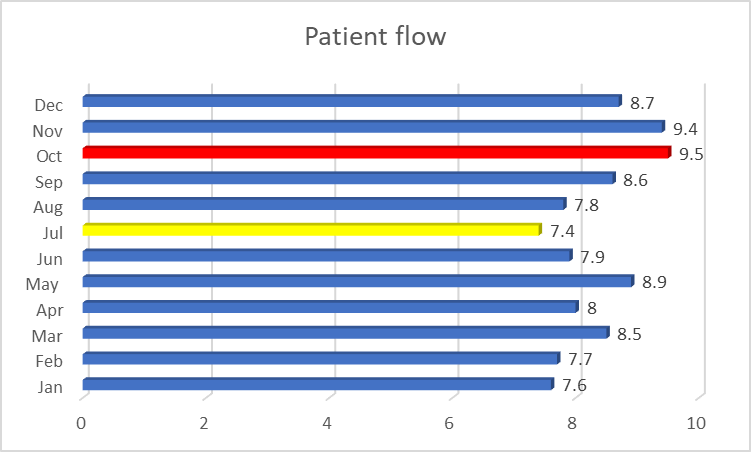


Figure S1 Percentage of footfall of patients during different months of the year

Table S3: Age distribution of patients

| **Age group** | No of Patients | % of total patients |
| --- | --- | --- |
| 0 to 10 | 153804 | 26.7 |
| 11 to 20 | 73665 | 12.8 |
| 21 to 30 | 122998 | 21.3 |
| 31 to 40 | 101046 | 17.5 |
| 41 to 50 | 48571 | 8.4 |
| 51 to 60 | 31147 | 5.4 |
| 61 to 70 | 22235 | 3.9 |
| 71 to 80 | 12812 | 2.2 |
| 80+ | 7213 | 1.3 |
| Missing | 2663 | 0.5 |
| Total | 576154 | 100.0 |


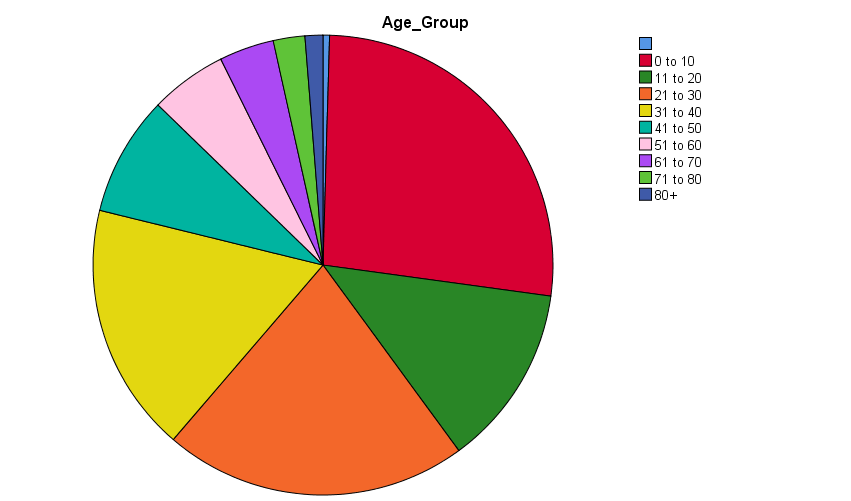


Figure S2 Age Distribution of patients presenting to ED

Table S4: Sex Distribution of patients

| **Sex** | No of Patients | % of total patients |
| --- | --- | --- |
| Female | 261500 | 45.4 |
| Male | 314637 | 54.6 |
| Missing | 17 | 0.0 |
| Total | 576154 | 100 |


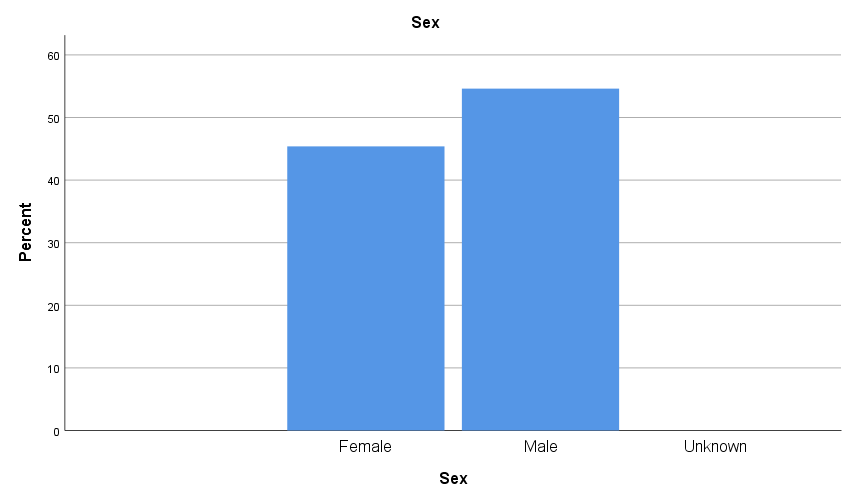


Figure S3 Gender Distribution of patients presenting to ED

Table S5: Emirati v/s Non Emirati patients

|  |  |  |
| --- | --- | --- |
| **Emirati v/s Non-Emirati** | No of Patients | % of total patients |
| Emirati | 352513 | 61.2 |
| Non -Emirati | 223641 | 38.8 |
| Total | 576154 | 100 |


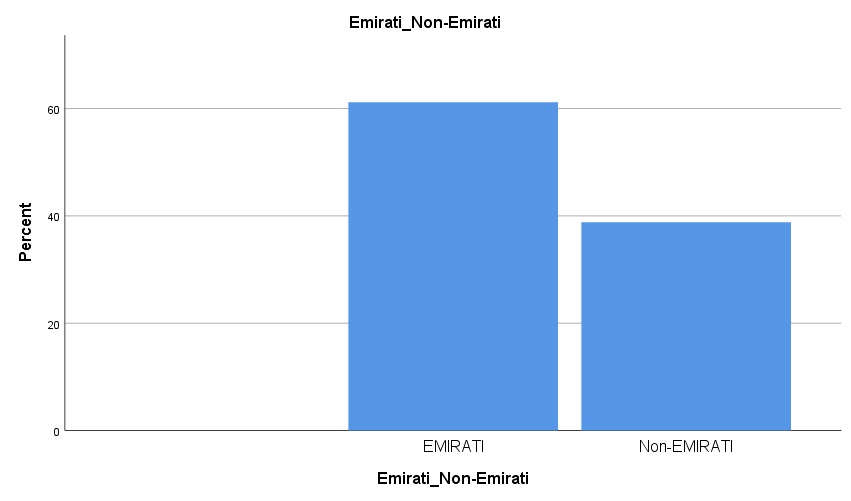


Figure S4 Nationality Distribution of patients presenting to ED

Table S6: Acuity distribution

| Acuity level | Number of patients | % of total patients |
| --- | --- | --- |
| 1 | 1948 | 0.3 |
| 2 | 21044 | 3.7 |
| 3 | 242538 | 42.1 |
| 4 | 247365 | 42.9 |
| 5 | 52181 | 9.1 |
| Missing | 11078 | 1.9 |
| Total | 576154 | 100 |

Table S7: Median LOS as per assigned acuity

| Acuity level | Median LOS (minutes) |
| --- | --- |
| 1 | 171.00 |
| 2 | 135.00 |
| 3 | 102.00 |
| 4 | 64.00 |
| 5 | 52.00 |
| Overall | 78.00 |
